# Supplementary material for: The phenotypic variations of multi-locus imprinting disturbances associated with maternal-effect variants of NLRP5 range from overt imprinting disorder to apparently healthy phenotype
Source: PubMed Central journal article supplement (PMC6907351; doi:10.1186/s13148-019-0760-8), 2019-12-11

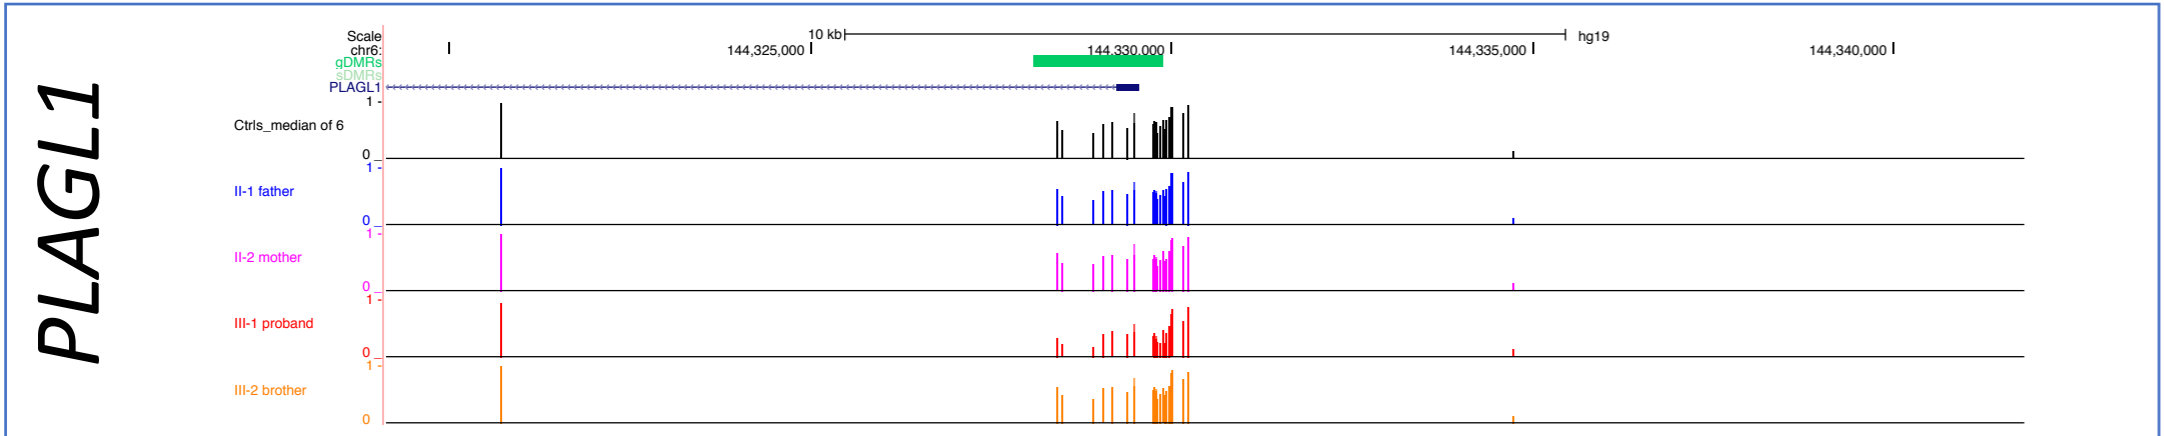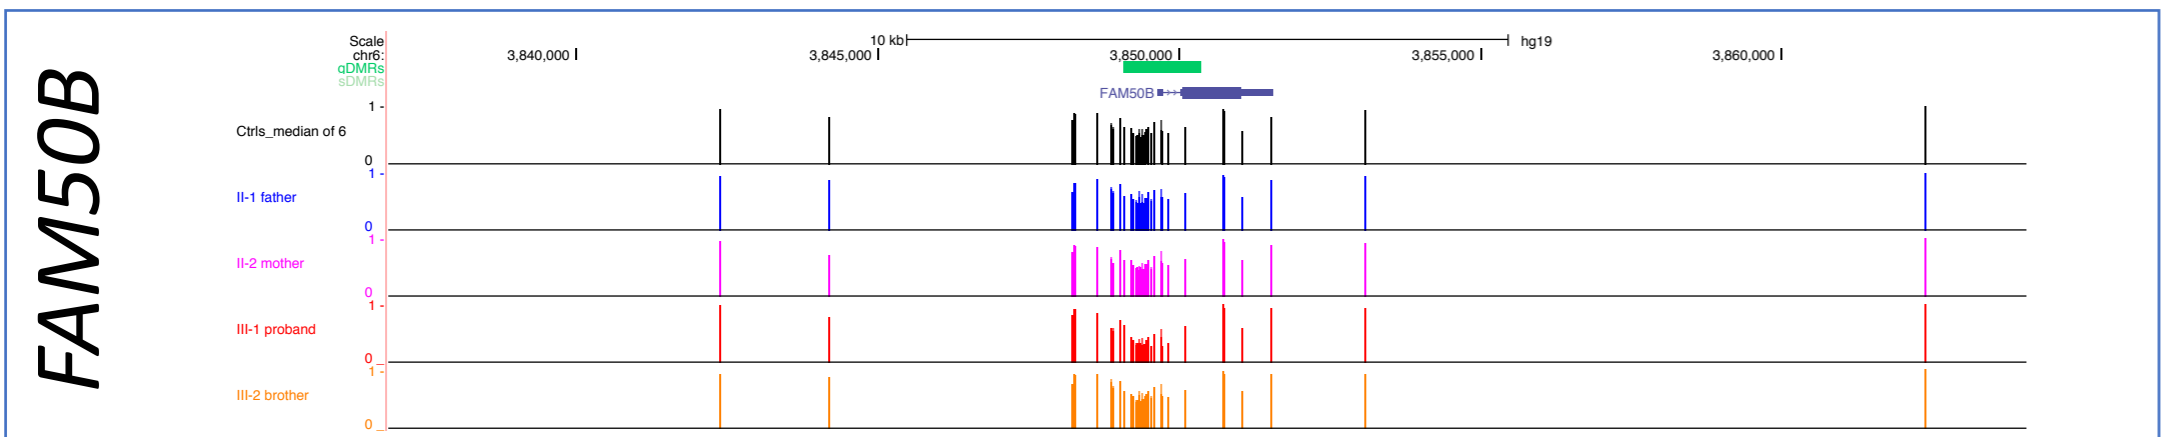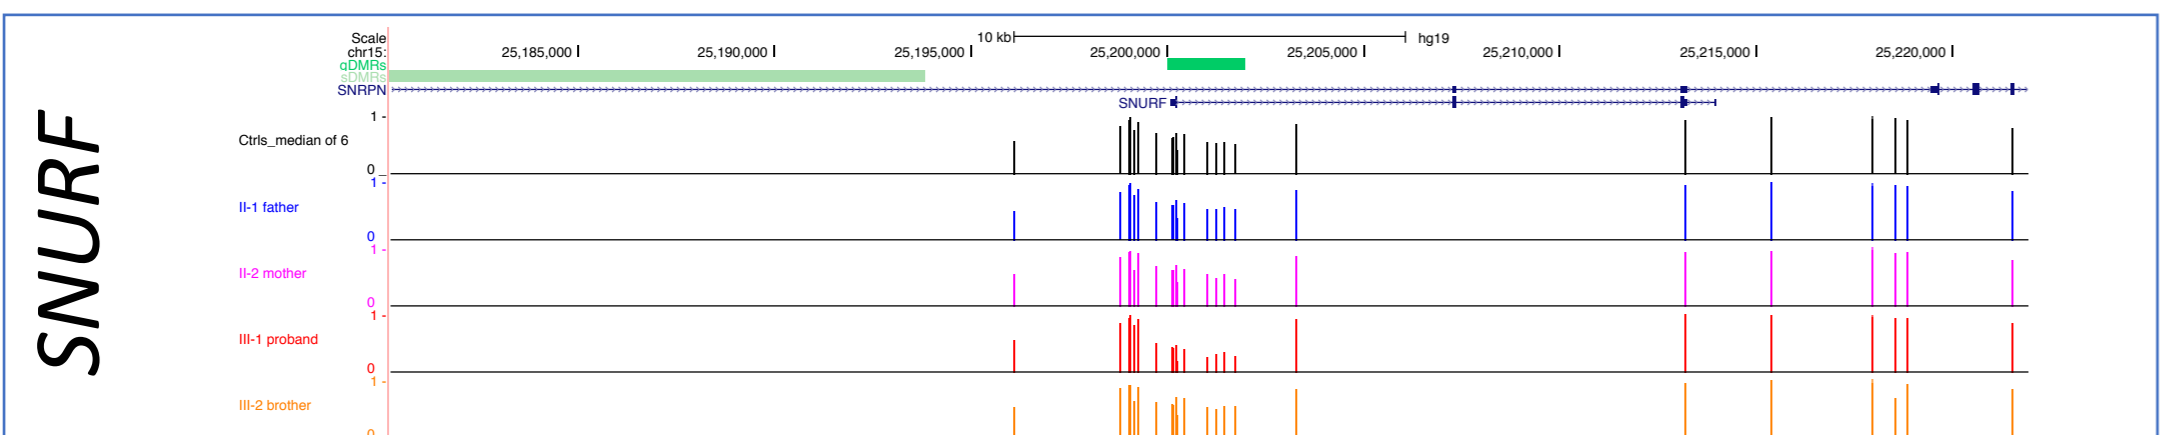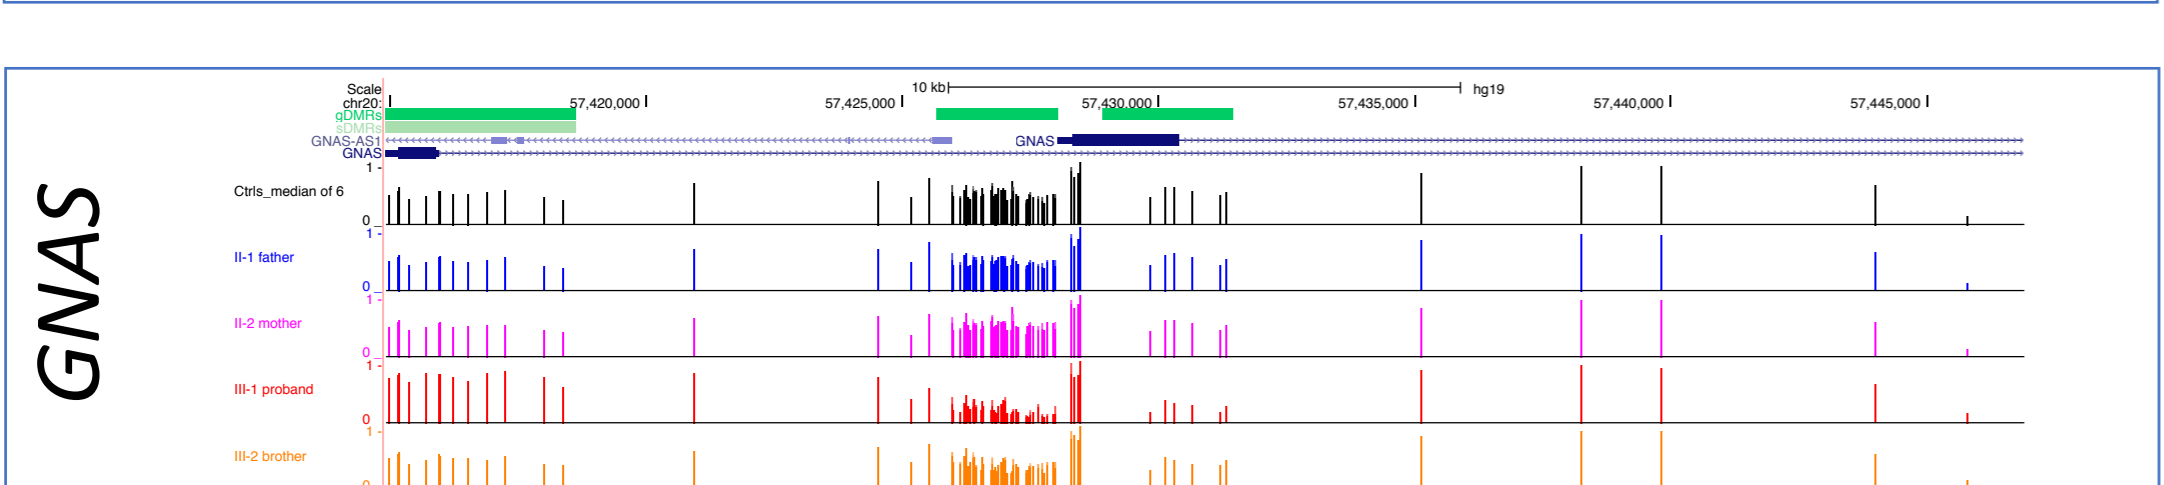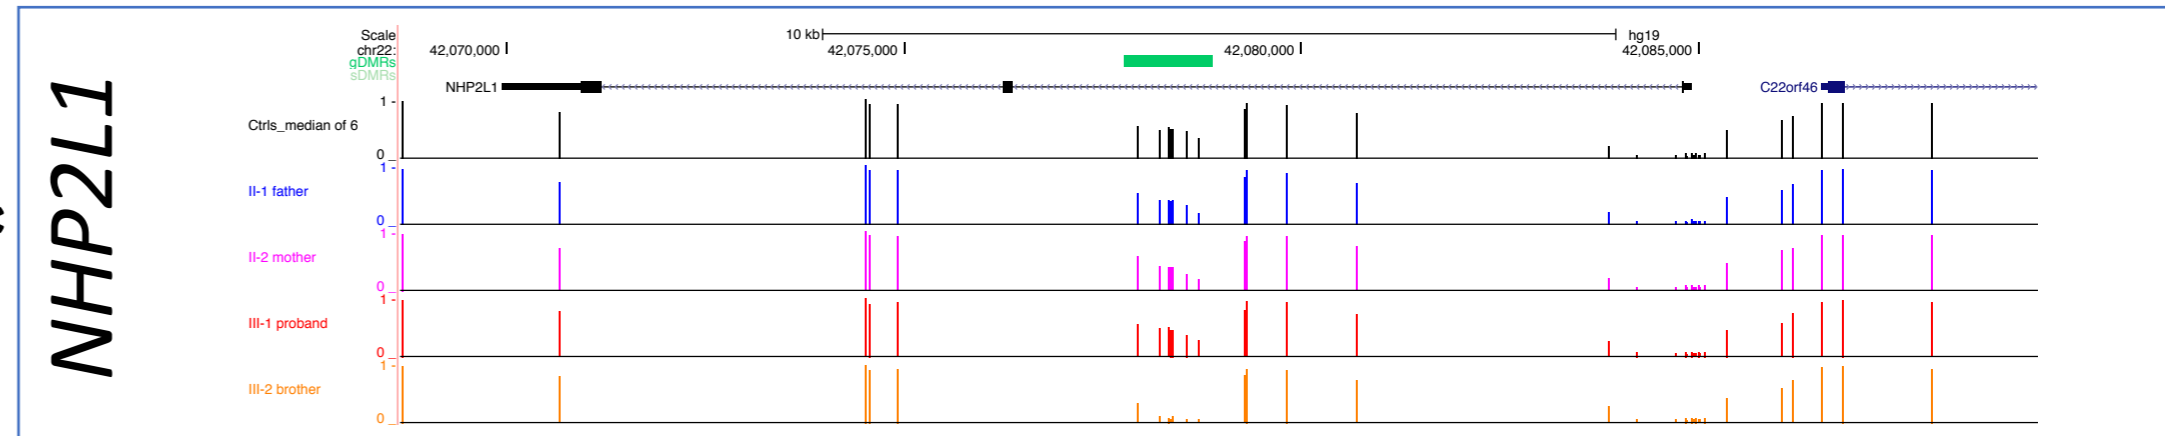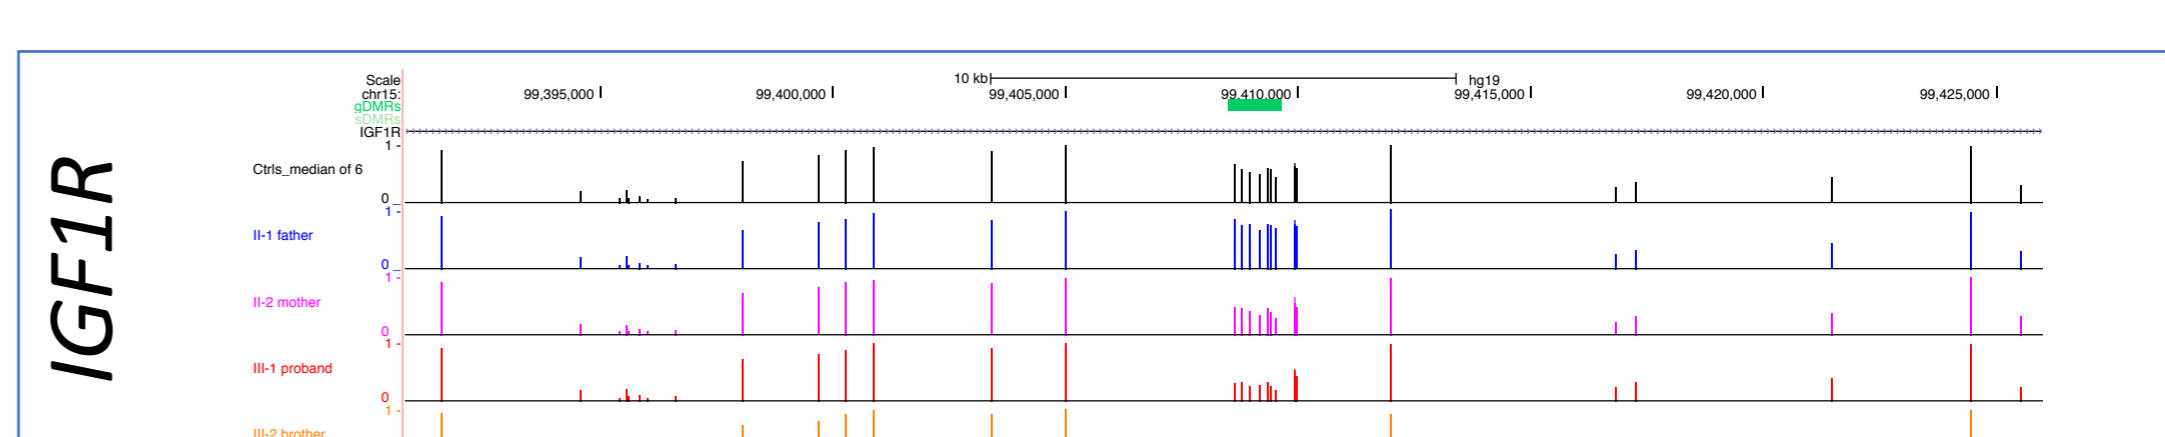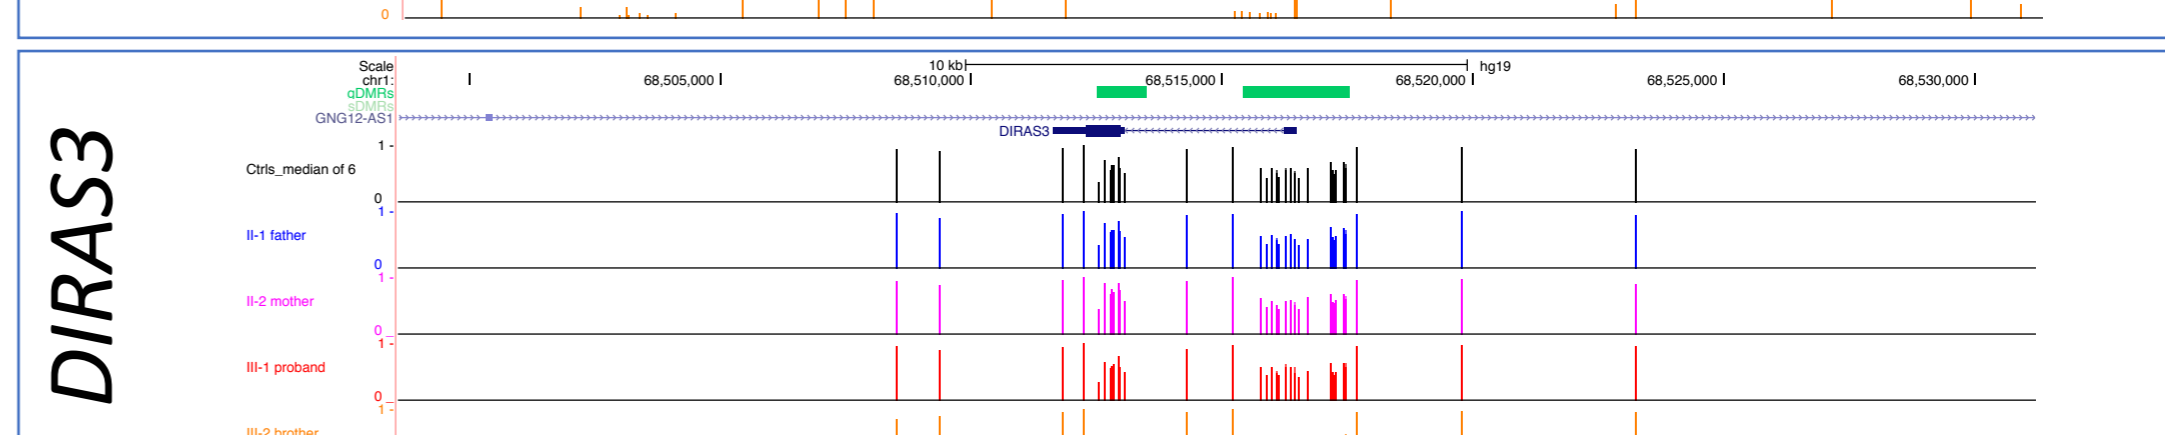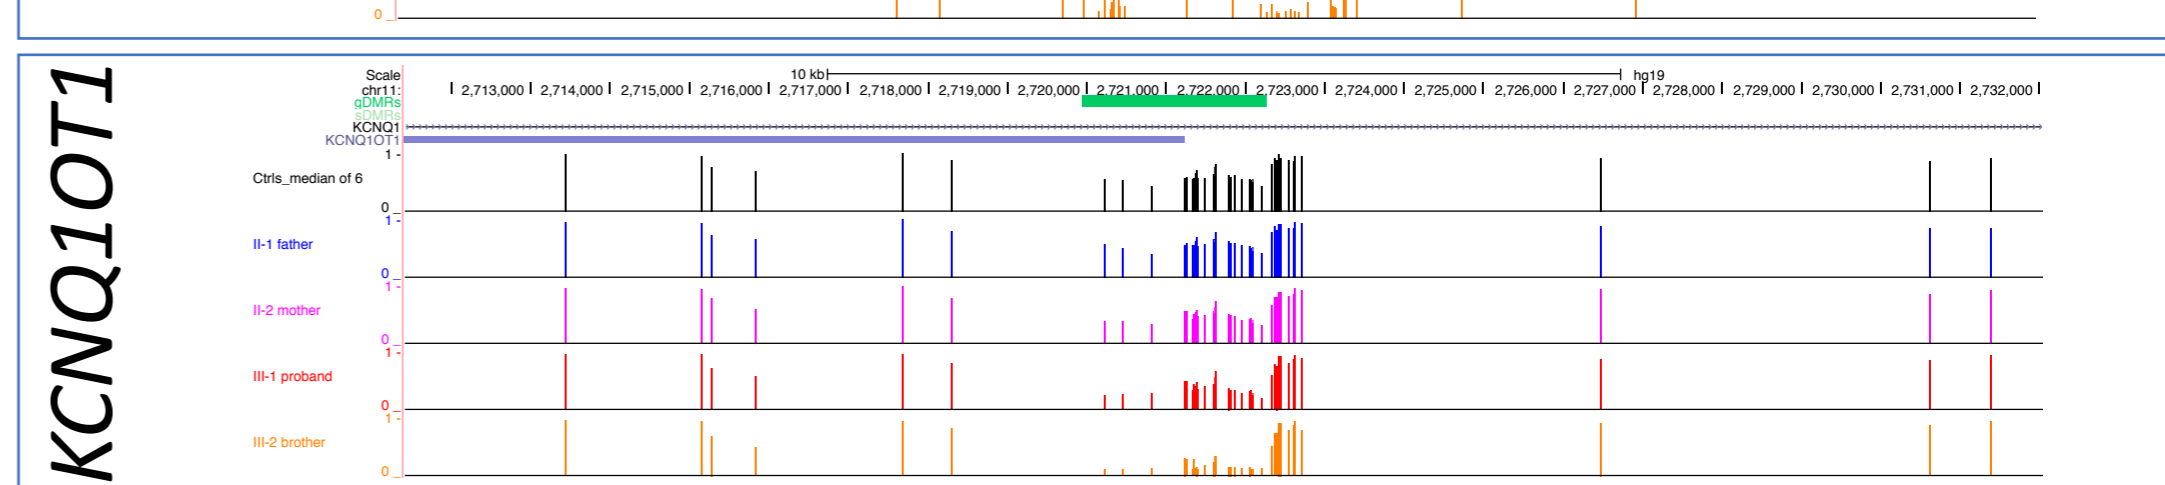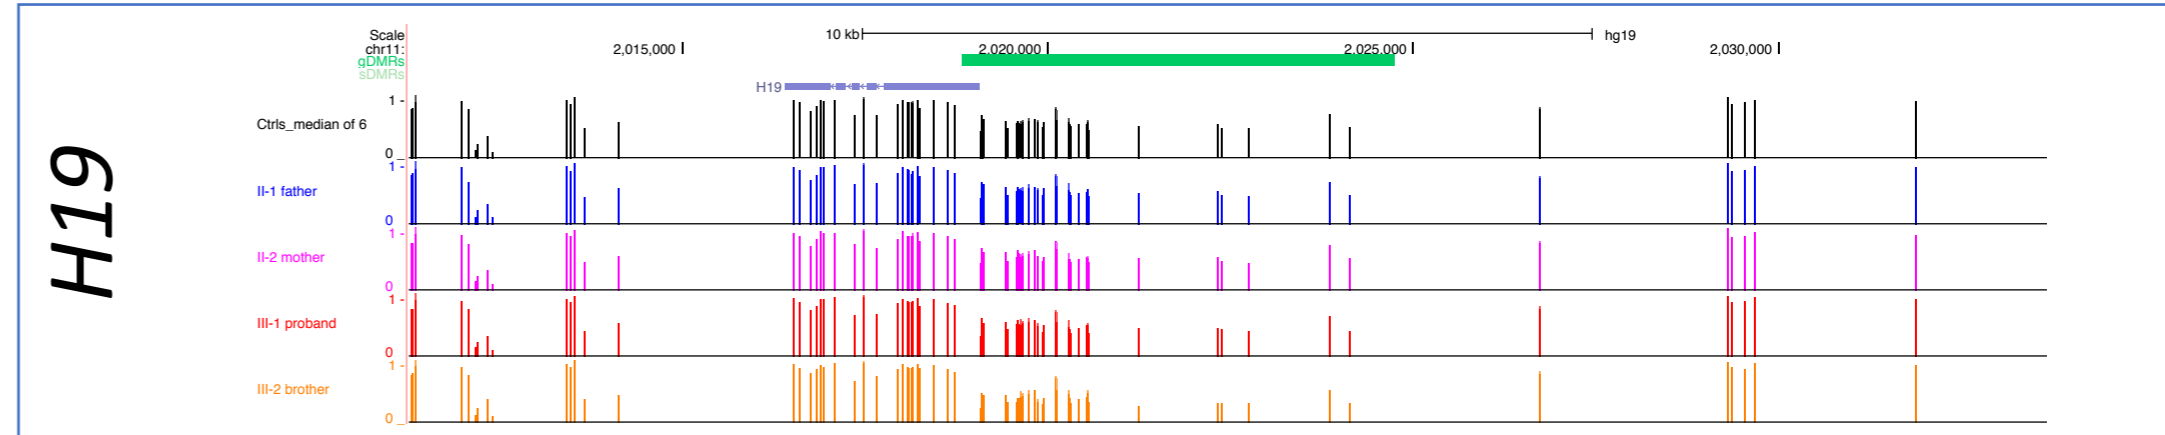

Supplement: 13148_2019_760_MOESM4_ESM.pdf [file 13148_2019_760_MOESM4_ESM.pdf]
